# Supplementary material for: 3D Scanning as a Tool to Measure Growth Rates of Live Coral Microfragments Used for Coral Reef Restoration
Source: Frontiers journal article supplement (doi:10.3389/fmars.2021.623645), 2021-04-30
Supplement: Table_2.XLSX [file Table_2.XLSX]

## Sheet: CORAL AREA DATA
masterID	ID	Date	d.since.start	data.type	ID_type	color.type	unique.med	area.1	tech.1	area.2	tech.2	area.3	tech.3	mean.area	meancf	sdcf	area.corr	coral_growth
014-3A2c	14-3A2c	7-8-19	0	photo	14-3A2c-photo	#F8766D	14-3A	0.467	Erin	0.473	Sarah	0.468	Erin	0.47	0.824	0.023	0.387	0.01943
1414-3A2c	14-3A2c	7-22-19	14	photo	14-3A2c-photo	#F8766D	14-3A	0.618	Erin	0.618	Bailey	0.625	Erin	0.618	0.824	0.023	0.509	0.01943
2714-3A2c	14-3A2c	8-5-2019	27	photo	14-3A2c-photo	#F8766D	14-3A	0.685	Erin	0.691	Bailey	0.693	Erin	0.688	0.824	0.023	0.567	0.01943
4114-3A2c	14-3A2c	8-19-2019	41	photo	14-3A2c-photo	#F8766D	14-3A	0.951	Bailey	0.925	Sarah	NA	NA	0.938	0.824	0.023	0.773	0.01943
5614-3A2c	14-3A2c	9-4-2019	56	photo	14-3A2c-photo	#F8766D	14-3A	1.144	Erin	1.161	Bailey	1.144	Erin	1.153	0.824	0.023	0.95	0.01943
6814-3A2c	14-3A2c	9-16-2019	68	photo	14-3A2c-photo	#F8766D	14-3A	1.33	Erin	1.343	Bailey	1.339	Erin	1.337	0.824	0.023	1.102	0.01943
8214-3A2c	14-3A2c	9-30-2019	82	photo	14-3A2c-photo	#F8766D	14-3A	1.71	Erin	1.698	Bailey	1.708	Erin	1.704	0.824	0.023	1.404	0.01943
9614-3A2c	14-3A2c	10-14-2019	96	photo	14-3A2c-photo	#F8766D	14-3A	1.985	Sarah	1.929	Sam	NA	NA	1.957	0.824	0.023	1.613	0.01943
11114-3A2c	14-3A2c	10-29-2019	111	photo	14-3A2c-photo	#F8766D	14-3A	2.298	Rob	2.343	Sam	2.348	Erin	2.321	0.824	0.023	1.913	0.01943
12314-3A2c	14-3A2c	11-11-2019	123	photo	14-3A2c-photo	#F8766D	14-3A	3.099	Bailey	3.169	Sarah	NA	NA	3.134	0.824	0.023	2.583	0.01943
13714-3A2c	14-3A2c	11-25-2019	137	photo	14-3A2c-photo	#F8766D	14-3A	3.567	Bailey	3.625	Sarah	NA	NA	3.596	0.824	0.023	2.963	0.01943
15114-3A2c	14-3A2c	12-9-2019	151	photo	14-3A2c-photo	#F8766D	14-3A	4.069	Erin	4.067	Sarah	NA	NA	4.068	0.824	0.023	3.352	0.01943
19314-3A2c	14-3A2c	1-21-2020	193	photo	14-3A2c-photo	#F8766D	14-3A	4.556	Bailey	4.574	Erin	NA	NA	4.565	0.824	0.023	3.762	0.01943
1514-3A2c	14-3A2c	7-23-2019	15	scan	14-3A2c-scan	#00BFC4	14-3A	NA	NA	NA	NA	NA	NA	1.07	NA	NA	1.07	0.02356
3514-3A2c	14-3A2c	8-13-2019	35	scan	14-3A2c-scan	#00BFC4	14-3A	NA	NA	NA	NA	NA	NA	1.25	NA	NA	1.25	0.02356
6814-3A2c	14-3A2c	9-16-2019	68	scan	14-3A2c-scan	#00BFC4	14-3A	NA	NA	NA	NA	NA	NA	1.8	NA	NA	1.8	0.02356
9914-3A2c	14-3A2c	10-17-2019	99	scan	14-3A2c-scan	#00BFC4	14-3A	NA	NA	NA	NA	NA	NA	2.38	NA	NA	2.38	0.02356
12414-3A2c	14-3A2c	11-12-2019	124	scan	14-3A2c-scan	#00BFC4	14-3A	NA	NA	NA	NA	NA	NA	3.19	NA	NA	3.19	0.02356
15214-3A2c	14-3A2c	12-10-2019	152	scan	14-3A2c-scan	#00BFC4	14-3A	NA	NA	NA	NA	NA	NA	4.06	NA	NA	4.06	0.02356
18614-3A2c	14-3A2c	1-14-2020	186	scan	14-3A2c-scan	#00BFC4	14-3A	NA	NA	NA	NA	NA	NA	4.91	NA	NA	4.91	0.02356
21314-3A2c	14-3A2c	2-11-2020	213	scan	14-3A2c-scan	#00BFC4	14-3A	NA	NA	NA	NA	NA	NA	5.5	NA	NA	5.5	0.02356
014-3A6r	14-3A6r	7-8-19	0	photo	14-3A6r-photo	#F8766D	14-3A	0.481	Erin	0.485	Sarah	0.781	Erin	0.483	0.97	0.017	0.469	0.0163
1414-3A6r	14-3A6r	7-22-19	14	photo	14-3A6r-photo	#F8766D	14-3A	0.684	Erin	0.674	Bailey	0.686	Erin	0.679	0.97	0.017	0.659	0.0163
2714-3A6r	14-3A6r	8-5-2019	27	photo	14-3A6r-photo	#F8766D	14-3A	0.727	Erin	0.717	Bailey	0.728	Erin	0.722	0.97	0.017	0.701	0.0163
4114-3A6r	14-3A6r	8-19-2019	41	photo	14-3A6r-photo	#F8766D	14-3A	0.86	Bailey	0.848	Sarah	NA	NA	0.854	0.97	0.017	0.829	0.0163
5614-3A6r	14-3A6r	9-4-2019	56	photo	14-3A6r-photo	#F8766D	14-3A	1.042	Erin	1.042	Bailey	1.04	Erin	1.042	0.97	0.017	1.011	0.0163
6814-3A6r	14-3A6r	9-16-2019	68	photo	14-3A6r-photo	#F8766D	14-3A	1.146	Erin	1.147	Bailey	1.15	Erin	1.147	0.97	0.017	1.113	0.0163
8214-3A6r	14-3A6r	9-30-2019	82	photo	14-3A6r-photo	#F8766D	14-3A	1.293	Erin	1.288	Bailey	1.29	Erin	1.291	0.97	0.017	1.253	0.0163
9614-3A6r	14-3A6r	10-14-2019	96	photo	14-3A6r-photo	#F8766D	14-3A	1.637	Sarah	1.582	Sam	NA	NA	1.61	0.97	0.017	1.562	0.0163
11114-3A6r	14-3A6r	10-29-2019	111	photo	14-3A6r-photo	#F8766D	14-3A	2.024	Rob	1.838	Sam	1.996	Erin	2.01	0.97	0.017	1.95	0.0163
12314-3A6r	14-3A6r	11-11-2019	123	photo	14-3A6r-photo	#F8766D	14-3A	2.43	Bailey	2.473	Sarah	NA	NA	2.452	0.97	0.017	2.379	0.0163
13714-3A6r	14-3A6r	11-25-2019	137	photo	14-3A6r-photo	#F8766D	14-3A	2.684	Bailey	2.692	Rob	NA	NA	2.688	0.97	0.017	2.608	0.0163
15114-3A6r	14-3A6r	12-9-2019	151	photo	14-3A6r-photo	#F8766D	14-3A	2.944	Erin	2.895	Sarah	NA	NA	2.92	0.97	0.017	2.833	0.0163
19314-3A6r	14-3A6r	1-21-2020	193	photo	14-3A6r-photo	#F8766D	14-3A	3.522	Bailey	3.578	Erin	NA	NA	3.55	0.97	0.017	3.445	0.0163
1514-3A6r	14-3A6r	7-23-2019	15	scan	14-3A6r-scan	#00BFC4	14-3A	NA	NA	NA	NA	NA	NA	1.29	NA	NA	1.29	0.01747
3514-3A6r	14-3A6r	8-13-2019	35	scan	14-3A6r-scan	#00BFC4	14-3A	NA	NA	NA	NA	NA	NA	1.41	NA	NA	1.41	0.01747
6814-3A6r	14-3A6r	9-16-2019	68	scan	14-3A6r-scan	#00BFC4	14-3A	NA	NA	NA	NA	NA	NA	1.76	NA	NA	1.76	0.01747
9914-3A6r	14-3A6r	10-17-2019	99	scan	14-3A6r-scan	#00BFC4	14-3A	NA	NA	NA	NA	NA	NA	2.31	NA	NA	2.31	0.01747
12414-3A6r	14-3A6r	11-12-2019	124	scan	14-3A6r-scan	#00BFC4	14-3A	NA	NA	NA	NA	NA	NA	3.07	NA	NA	3.07	0.01747
15214-3A6r	14-3A6r	12-10-2019	152	scan	14-3A6r-scan	#00BFC4	14-3A	NA	NA	NA	NA	NA	NA	3.6	NA	NA	3.6	0.01747
18614-3A6r	14-3A6r	1-14-2020	186	scan	14-3A6r-scan	#00BFC4	14-3A	NA	NA	NA	NA	NA	NA	4.19	NA	NA	4.19	0.01747
21314-3A6r	14-3A6r	2-11-2020	213	scan	14-3A6r-scan	#00BFC4	14-3A	NA	NA	NA	NA	NA	NA	4.44	NA	NA	4.44	0.01747
014-3B1r	14-3B1r	7-8-19	0	photo	14-3B1r-photo	#F8766D	14-3B	0.738	Erin	0.749	Sarah	0.734	Erin	0.744	0.923	0.016	0.686	0.01219
1414-3B1r	14-3B1r	7-22-19	14	photo	14-3B1r-photo	#F8766D	14-3B	0.861	Erin	0.874	Bailey	0.869	Erin	0.868	0.923	0.016	0.801	0.01219
2714-3B1r	14-3B1r	8-5-2019	27	photo	14-3B1r-photo	#F8766D	14-3B	0.979	Erin	0.998	Bailey	0.974	Erin	0.989	0.923	0.016	0.913	0.01219
4114-3B1r	14-3B1r	8-19-2019	41	photo	14-3B1r-photo	#F8766D	14-3B	1.157	Erin	1.172	Bailey	1.154	Erin	1.165	0.923	0.016	1.075	0.01219
5614-3B1r	14-3B1r	9-4-2019	56	photo	14-3B1r-photo	#F8766D	14-3B	1.283	Erin	1.259	Bailey	1.283	Erin	1.271	0.923	0.016	1.173	0.01219
6814-3B1r	14-3B1r	9-16-2019	68	photo	14-3B1r-photo	#F8766D	14-3B	1.353	Erin	1.307	Bailey	1.367	Erin	1.33	0.923	0.016	1.227	0.01219
8214-3B1r	14-3B1r	9-30-2019	82	photo	14-3B1r-photo	#F8766D	14-3B	1.655	Erin	1.642	Bailey	1.65	Erin	1.649	0.923	0.016	1.522	0.01219
9614-3B1r	14-3B1r	10-14-2019	96	photo	14-3B1r-photo	#F8766D	14-3B	1.864	Sarah	1.853	Sam	NA	NA	1.859	0.923	0.016	1.715	0.01219
11114-3B1r	14-3B1r	10-29-2019	111	photo	14-3B1r-photo	#F8766D	14-3B	2.096	Rob	2.424	Sam	2.074	Erin	2.085	0.923	0.016	1.924	0.01219
12314-3B1r	14-3B1r	11-11-2019	123	photo	14-3B1r-photo	#F8766D	14-3B	2.282	Bailey	2.313	Sarah	NA	NA	2.298	0.923	0.016	2.12	0.01219
13714-3B1r	14-3B1r	11-25-2019	137	photo	14-3B1r-photo	#F8766D	14-3B	2.541	Bailey	2.552	Sarah	NA	NA	2.547	0.923	0.016	2.35	0.01219
15114-3B1r	14-3B1r	12-9-2019	151	photo	14-3B1r-photo	#F8766D	14-3B	2.824	Erin	2.834	Sarah	NA	NA	2.829	0.923	0.016	2.61	0.01219
19314-3B1r	14-3B1r	1-21-2020	193	photo	14-3B1r-photo	#F8766D	14-3B	3.055	Bailey	3.067	Erin	NA	NA	3.061	0.923	0.016	2.824	0.01219
1514-3B1r	14-3B1r	7-23-2019	15	scan	14-3B1r-scan	#00BFC4	14-3B	NA	NA	NA	NA	NA	NA	1.59	NA	NA	1.59	0.01292
3514-3B1r	14-3B1r	8-13-2019	35	scan	14-3B1r-scan	#00BFC4	14-3B	NA	NA	NA	NA	NA	NA	1.71	NA	NA	1.71	0.01292
6814-3B1r	14-3B1r	9-16-2019	68	scan	14-3B1r-scan	#00BFC4	14-3B	NA	NA	NA	NA	NA	NA	2.17	NA	NA	2.17	0.01292
9914-3B1r	14-3B1r	10-17-2019	99	scan	14-3B1r-scan	#00BFC4	14-3B	NA	NA	NA	NA	NA	NA	2.49	NA	NA	2.49	0.01292
12414-3B1r	14-3B1r	11-12-2019	124	scan	14-3B1r-scan	#00BFC4	14-3B	NA	NA	NA	NA	NA	NA	2.97	NA	NA	2.97	0.01292
15214-3B1r	14-3B1r	12-10-2019	152	scan	14-3B1r-scan	#00BFC4	14-3B	NA	NA	NA	NA	NA	NA	3.35	NA	NA	3.35	0.01292
18614-3B1r	14-3B1r	1-14-2020	186	scan	14-3B1r-scan	#00BFC4	14-3B	NA	NA	NA	NA	NA	NA	3.75	NA	NA	3.75	0.01292
21314-3B1r	14-3B1r	2-11-2020	213	scan	14-3B1r-scan	#00BFC4	14-3B	NA	NA	NA	NA	NA	NA	4.02	NA	NA	4.02	0.01292
014-3B3c	14-3B3c	7-8-19	0	photo	14-3B3c-photo	#F8766D	14-3B	0.536	Erin	0.54	Sarah	0.534	Erin	0.538	0.82	0.022	0.441	0.01703
1414-3B3c	14-3B3c	7-22-19	14	photo	14-3B3c-photo	#F8766D	14-3B	0.727	Erin	0.722	Bailey	0.724	Erin	0.725	0.82	0.022	0.594	0.01703
2714-3B3c	14-3B3c	8-5-2019	27	photo	14-3B3c-photo	#F8766D	14-3B	0.814	Erin	0.817	Bailey	0.818	Erin	0.816	0.82	0.022	0.669	0.01703
4114-3B3c	14-3B3c	8-19-2019	41	photo	14-3B3c-photo	#F8766D	14-3B	0.984	Erin	0.974	Bailey	0.983	Erin	0.979	0.82	0.022	0.803	0.01703
5614-3B3c	14-3B3c	9-4-2019	56	photo	14-3B3c-photo	#F8766D	14-3B	1.124	Erin	1.117	Bailey	1.124	Erin	1.121	0.82	0.022	0.919	0.01703
6814-3B3c	14-3B3c	9-16-2019	68	photo	14-3B3c-photo	#F8766D	14-3B	1.328	Erin	1.294	Bailey	1.33	Erin	1.311	0.82	0.022	1.075	0.01703
8214-3B3c	14-3B3c	9-30-2019	82	photo	14-3B3c-photo	#F8766D	14-3B	1.612	Erin	1.623	Bailey	1.607	Erin	1.618	0.82	0.022	1.326	0.01703
9614-3B3c	14-3B3c	10-14-2019	96	photo	14-3B3c-photo	#F8766D	14-3B	1.854	Sarah	1.892	Sam	NA	NA	1.873	0.82	0.022	1.535	0.01703
11114-3B3c	14-3B3c	10-29-2019	111	photo	14-3B3c-photo	#F8766D	14-3B	2.241	Rob	2.231	Sam	2.262	Erin	2.236	0.82	0.022	1.833	0.01703
12314-3B3c	14-3B3c	11-11-2019	123	photo	14-3B3c-photo	#F8766D	14-3B	2.874	Bailey	2.907	Sarah	NA	NA	2.891	0.82	0.022	2.37	0.01703
13714-3B3c	14-3B3c	11-25-2019	137	photo	14-3B3c-photo	#F8766D	14-3B	3.403	Bailey	3.467	Sarah	NA	NA	3.435	0.82	0.022	2.816	0.01703
15114-3B3c	14-3B3c	12-9-2019	151	photo	14-3B3c-photo	#F8766D	14-3B	3.782	Erin	3.77	Sarah	NA	NA	3.776	0.82	0.022	3.095	0.01703
19314-3B3c	14-3B3c	1-21-2020	193	photo	14-3B3c-photo	#F8766D	14-3B	4.074	Bailey	4.133	Erin	NA	NA	4.104	0.82	0.022	3.364	0.01703
1514-3B3c	14-3B3c	7-23-2019	15	scan	14-3B3c-scan	#00BFC4	14-3B	NA	NA	NA	NA	NA	NA	1.15	NA	NA	1.15	0.01859
3514-3B3c	14-3B3c	8-13-2019	35	scan	14-3B3c-scan	#00BFC4	14-3B	NA	NA	NA	NA	NA	NA	1.35	NA	NA	1.35	0.01859
6814-3B3c	14-3B3c	9-16-2019	68	scan	14-3B3c-scan	#00BFC4	14-3B	NA	NA	NA	NA	NA	NA	1.77	NA	NA	1.77	0.01859
9914-3B3c	14-3B3c	10-17-2019	99	scan	14-3B3c-scan	#00BFC4	14-3B	NA	NA	NA	NA	NA	NA	2.32	NA	NA	2.32	0.01859
12414-3B3c	14-3B3c	11-12-2019	124	scan	14-3B3c-scan	#00BFC4	14-3B	NA	NA	NA	NA	NA	NA	3.05	NA	NA	3.05	0.01859
15214-3B3c	14-3B3c	12-10-2019	152	scan	14-3B3c-scan	#00BFC4	14-3B	NA	NA	NA	NA	NA	NA	3.8	NA	NA	3.8	0.01859
18614-3B3c	14-3B3c	1-14-2020	186	scan	14-3B3c-scan	#00BFC4	14-3B	NA	NA	NA	NA	NA	NA	4.26	NA	NA	4.26	0.01859
21314-3B3c	14-3B3c	2-11-2020	213	scan	14-3B3c-scan	#00BFC4	14-3B	NA	NA	NA	NA	NA	NA	4.52	NA	NA	4.52	0.01859
014-4A3r	14-4A3r	7-8-19	0	photo	14-4A3r-photo	#F8766D	14-4A	0.622	Erin	0.63	Sarah	0.62	Erin	0.626	0.917	0.022	0.574	0.0175
1414-4A3r	14-4A3r	7-22-19	14	photo	14-4A3r-photo	#F8766D	14-4A	0.871	Erin	0.865	Bailey	0.873	Erin	0.868	0.917	0.022	0.796	0.0175
2714-4A3r	14-4A3r	8-5-2019	27	photo	14-4A3r-photo	#F8766D	14-4A	0.938	Erin	0.944	Bailey	0.939	Erin	0.941	0.917	0.022	0.863	0.0175
4114-4A3r	14-4A3r	8-19-2019	41	photo	14-4A3r-photo	#F8766D	14-4A	1.079	Erin	1.082	Bailey	1.08	Erin	1.081	0.917	0.022	0.991	0.0175
5614-4A3r	14-4A3r	9-4-2019	56	photo	14-4A3r-photo	#F8766D	14-4A	1.375	Erin	1.393	Bailey	1.374	Erin	1.384	0.917	0.022	1.269	0.0175
6814-4A3r	14-4A3r	9-16-2019	68	photo	14-4A3r-photo	#F8766D	14-4A	1.752	Erin	1.738	Bailey	1.754	Erin	1.745	0.917	0.022	1.6	0.0175
8214-4A3r	14-4A3r	9-30-2019	82	photo	14-4A3r-photo	#F8766D	14-4A	1.894	Erin	1.899	Sarah	NA	NA	1.897	0.917	0.022	1.739	0.0175
9614-4A3r	14-4A3r	10-14-2019	96	photo	14-4A3r-photo	#F8766D	14-4A	2.076	Sarah	1.981	Sam	NA	NA	2.029	0.917	0.022	1.86	0.0175
11114-4A3r	14-4A3r	10-29-2019	111	photo	14-4A3r-photo	#F8766D	14-4A	2.493	Rob	2.517	Sam	2.506	Erin	2.505	0.917	0.022	2.296	0.0175
12314-4A3r	14-4A3r	11-11-2019	123	photo	14-4A3r-photo	#F8766D	14-4A	2.884	Bailey	2.908	Sarah	NA	NA	2.896	0.917	0.022	2.655	0.0175
13714-4A3r	14-4A3r	11-25-2019	137	photo	14-4A3r-photo	#F8766D	14-4A	3.289	Rob	3.306	Sarah	NA	NA	3.298	0.917	0.022	3.023	0.0175
15114-4A3r	14-4A3r	12-9-2019	151	photo	14-4A3r-photo	#F8766D	14-4A	3.717	Erin	3.696	Sarah	NA	NA	3.707	0.917	0.022	3.398	0.0175
19314-4A3r	14-4A3r	1-21-2020	193	photo	14-4A3r-photo	#F8766D	14-4A	3.909	Bailey	3.939	Erin	NA	NA	3.924	0.917	0.022	3.597	0.0175
1514-4A3r	14-4A3r	7-23-2019	15	scan	14-4A3r-scan	#00BFC4	14-4A	NA	NA	NA	NA	NA	NA	1.28	NA	NA	1.28	0.01761
3514-4A3r	14-4A3r	8-13-2019	35	scan	14-4A3r-scan	#00BFC4	14-4A	NA	NA	NA	NA	NA	NA	1.52	NA	NA	1.52	0.01761
6814-4A3r	14-4A3r	9-16-2019	68	scan	14-4A3r-scan	#00BFC4	14-4A	NA	NA	NA	NA	NA	NA	2.12	NA	NA	2.12	0.01761
9914-4A3r	14-4A3r	10-17-2019	99	scan	14-4A3r-scan	#00BFC4	14-4A	NA	NA	NA	NA	NA	NA	2.47	NA	NA	2.47	0.01761
12414-4A3r	14-4A3r	11-12-2019	124	scan	14-4A3r-scan	#00BFC4	14-4A	NA	NA	NA	NA	NA	NA	3.51	NA	NA	3.51	0.01761
15214-4A3r	14-4A3r	12-10-2019	152	scan	14-4A3r-scan	#00BFC4	14-4A	NA	NA	NA	NA	NA	NA	3.91	NA	NA	3.91	0.01761
18614-4A3r	14-4A3r	1-14-2020	186	scan	14-4A3r-scan	#00BFC4	14-4A	NA	NA	NA	NA	NA	NA	4.2	NA	NA	4.2	0.01761
21314-4A3r	14-4A3r	2-11-2020	213	scan	14-4A3r-scan	#00BFC4	14-4A	NA	NA	NA	NA	NA	NA	4.55	NA	NA	4.55	0.01761
014-4A4c	14-4A4c	7-8-19	0	photo	14-4A4c-photo	#F8766D	14-4A	0.857	Erin	0.872	Sarah	0.858	Erin	0.865	0.795	0.063	0.687	0.02256
1414-4A4c	14-4A4c	7-22-19	14	photo	14-4A4c-photo	#F8766D	14-4A	1.075	Erin	1.081	Bailey	1.077	Erin	1.078	0.795	0.063	0.857	0.02256
2714-4A4c	14-4A4c	8-5-2019	27	photo	14-4A4c-photo	#F8766D	14-4A	1.205	Erin	1.221	Bailey	1.202	Erin	1.213	0.795	0.063	0.964	0.02256
4114-4A4c	14-4A4c	8-19-2019	41	photo	14-4A4c-photo	#F8766D	14-4A	1.565	Erin	1.544	Bailey	1.568	Erin	1.555	0.795	0.063	1.236	0.02256
5614-4A4c	14-4A4c	9-4-2019	56	photo	14-4A4c-photo	#F8766D	14-4A	2.071	Erin	2.046	Bailey	2.072	Erin	2.059	0.795	0.063	1.636	0.02256
6814-4A4c	14-4A4c	9-16-2019	68	photo	14-4A4c-photo	#F8766D	14-4A	2.523	Erin	2.48	Bailey	2.527	Erin	2.502	0.795	0.063	1.988	0.02256
8214-4A4c	14-4A4c	9-30-2019	82	photo	14-4A4c-photo	#F8766D	14-4A	2.811	Erin	2.801	Sarah	NA	NA	2.806	0.795	0.063	2.23	0.02256
9614-4A4c	14-4A4c	10-14-2019	96	photo	14-4A4c-photo	#F8766D	14-4A	3.218	Sarah	3.138	Sam	NA	NA	3.178	0.795	0.063	2.526	0.02256
11114-4A4c	14-4A4c	10-29-2019	111	photo	14-4A4c-photo	#F8766D	14-4A	3.398	Rob	3.312	Sam	3.456	Erin	3.355	0.795	0.063	2.666	0.02256
12314-4A4c	14-4A4c	11-11-2019	123	photo	14-4A4c-photo	#F8766D	14-4A	3.974	Bailey	4.047	Sarah	NA	NA	4.011	0.795	0.063	3.187	0.02256
13714-4A4c	14-4A4c	11-25-2019	137	photo	14-4A4c-photo	#F8766D	14-4A	4.953	Rob	5.151	Sarah	NA	NA	5.052	0.795	0.063	4.015	0.02256
15114-4A4c	14-4A4c	12-9-2019	151	photo	14-4A4c-photo	#F8766D	14-4A	5.329	Erin	5.513	Sarah	NA	NA	5.421	0.795	0.063	4.308	0.02256
19314-4A4c	14-4A4c	1-21-2020	193	photo	14-4A4c-photo	#F8766D	14-4A	5.643	Bailey	5.698	Erin	NA	NA	5.671	0.795	0.063	4.507	0.02256
1514-4A4c	14-4A4c	7-23-2019	15	scan	14-4A4c-scan	#00BFC4	14-4A	NA	NA	NA	NA	NA	NA	1.79	NA	NA	1.79	0.02698
3514-4A4c	14-4A4c	8-13-2019	35	scan	14-4A4c-scan	#00BFC4	14-4A	NA	NA	NA	NA	NA	NA	2.21	NA	NA	2.21	0.02698
6814-4A4c	14-4A4c	9-16-2019	68	scan	14-4A4c-scan	#00BFC4	14-4A	NA	NA	NA	NA	NA	NA	2.96	NA	NA	2.96	0.02698
9914-4A4c	14-4A4c	10-17-2019	99	scan	14-4A4c-scan	#00BFC4	14-4A	NA	NA	NA	NA	NA	NA	3.43	NA	NA	3.43	0.02698
12414-4A4c	14-4A4c	11-12-2019	124	scan	14-4A4c-scan	#00BFC4	14-4A	NA	NA	NA	NA	NA	NA	4.45	NA	NA	4.45	0.02698
15214-4A4c	14-4A4c	12-10-2019	152	scan	14-4A4c-scan	#00BFC4	14-4A	NA	NA	NA	NA	NA	NA	5.39	NA	NA	5.39	0.02698
18614-4A4c	14-4A4c	1-14-2020	186	scan	14-4A4c-scan	#00BFC4	14-4A	NA	NA	NA	NA	NA	NA	6.22	NA	NA	6.22	0.02698
21314-4A4c	14-4A4c	2-11-2020	213	scan	14-4A4c-scan	#00BFC4	14-4A	NA	NA	NA	NA	NA	NA	7.06	NA	NA	7.06	0.02698
014-4B4r	14-4B4r	7-8-19	0	photo	14-4B4r-photo	#F8766D	14-4B	0.501	Erin	0.498	Sarah	0.506	Erin	0.5	0.929	0.026	0.465	0.00918
1414-4B4r	14-4B4r	7-22-19	14	photo	14-4B4r-photo	#F8766D	14-4B	0.658	Erin	0.67	Bailey	0.659	Erin	0.664	0.929	0.026	0.617	0.00918
2714-4B4r	14-4B4r	8-5-2019	27	photo	14-4B4r-photo	#F8766D	14-4B	0.738	Erin	0.736	Bailey	0.74	Erin	0.737	0.929	0.026	0.685	0.00918
4114-4B4r	14-4B4r	8-19-2019	41	photo	14-4B4r-photo	#F8766D	14-4B	0.765	Erin	0.766	Bailey	0.767	Erin	0.766	0.929	0.026	0.712	0.00918
5614-4B4r	14-4B4r	9-4-2019	56	photo	14-4B4r-photo	#F8766D	14-4B	0.854	Erin	0.861	Bailey	0.859	Erin	0.858	0.929	0.026	0.797	0.00918
6814-4B4r	14-4B4r	9-16-2019	68	photo	14-4B4r-photo	#F8766D	14-4B	1.038	Erin	1.031	Bailey	1.031	Erin	1.035	0.929	0.026	0.962	0.00918
8214-4B4r	14-4B4r	9-30-2019	82	photo	14-4B4r-photo	#F8766D	14-4B	1.129	Erin	1.131	Sarah	NA	NA	1.13	0.929	0.026	1.05	0.00918
9614-4B4r	14-4B4r	10-14-2019	96	photo	14-4B4r-photo	#F8766D	14-4B	1.281	Sarah	1.243	Sam	NA	NA	1.262	0.929	0.026	1.173	0.00918
11114-4B4r	14-4B4r	10-29-2019	111	photo	14-4B4r-photo	#F8766D	14-4B	1.532	Rob	1.529	Sam	1.557	Erin	1.531	0.929	0.026	1.423	0.00918
12314-4B4r	14-4B4r	11-11-2019	123	photo	14-4B4r-photo	#F8766D	14-4B	1.698	Bailey	1.722	Sarah	NA	NA	1.71	0.929	0.026	1.589	0.00918
13714-4B4r	14-4B4r	11-25-2019	137	photo	14-4B4r-photo	#F8766D	14-4B	1.882	Rob	1.888	Sarah	NA	NA	1.885	0.929	0.026	1.752	0.00918
15114-4B4r	14-4B4r	12-9-2019	151	photo	14-4B4r-photo	#F8766D	14-4B	2.104	Erin	2.109	Sarah	NA	NA	2.107	0.929	0.026	1.958	0.00918
19314-4B4r	14-4B4r	1-21-2020	193	photo	14-4B4r-photo	#F8766D	14-4B	2.215	Bailey	2.235	Erin	NA	NA	2.225	0.929	0.026	2.068	0.00918
1514-4B4r	14-4B4r	7-23-2019	15	scan	14-4B4r-scan	#00BFC4	14-4B	NA	NA	NA	NA	NA	NA	1.33	NA	NA	1.33	0.00886
3514-4B4r	14-4B4r	8-13-2019	35	scan	14-4B4r-scan	#00BFC4	14-4B	NA	NA	NA	NA	NA	NA	1.57	NA	NA	1.57	0.00886
6814-4B4r	14-4B4r	9-16-2019	68	scan	14-4B4r-scan	#00BFC4	14-4B	NA	NA	NA	NA	NA	NA	1.76	NA	NA	1.76	0.00886
9914-4B4r	14-4B4r	10-17-2019	99	scan	14-4B4r-scan	#00BFC4	14-4B	NA	NA	NA	NA	NA	NA	2.05	NA	NA	2.05	0.00886
12414-4B4r	14-4B4r	11-12-2019	124	scan	14-4B4r-scan	#00BFC4	14-4B	NA	NA	NA	NA	NA	NA	2.43	NA	NA	2.43	0.00886
15214-4B4r	14-4B4r	12-10-2019	152	scan	14-4B4r-scan	#00BFC4	14-4B	NA	NA	NA	NA	NA	NA	2.52	NA	NA	2.52	0.00886
18614-4B4r	14-4B4r	1-14-2020	186	scan	14-4B4r-scan	#00BFC4	14-4B	NA	NA	NA	NA	NA	NA	2.81	NA	NA	2.81	0.00886
21314-4B4r	14-4B4r	2-11-2020	213	scan	14-4B4r-scan	#00BFC4	14-4B	NA	NA	NA	NA	NA	NA	3.13	NA	NA	3.13	0.00886
014-4B6c	14-4B6c	7-8-19	0	photo	14-4B6c-photo	#F8766D	14-4B	0.593	Erin	0.612	Sarah	0.595	Erin	0.603	0.797	0.037	0.481	0.01947
1414-4B6c	14-4B6c	7-22-19	14	photo	14-4B6c-photo	#F8766D	14-4B	0.811	Erin	0.809	Bailey	0.82	Erin	0.81	0.797	0.037	0.646	0.01947
2714-4B6c	14-4B6c	8-5-2019	27	photo	14-4B6c-photo	#F8766D	14-4B	0.938	Erin	0.94	Bailey	0.931	Erin	0.939	0.797	0.037	0.748	0.01947
4114-4B6c	14-4B6c	8-19-2019	41	photo	14-4B6c-photo	#F8766D	14-4B	1.18	Erin	1.174	Bailey	1.17	Erin	1.177	0.797	0.037	0.938	0.01947
5614-4B6c	14-4B6c	9-4-2019	56	photo	14-4B6c-photo	#F8766D	14-4B	1.627	Erin	1.611	Bailey	1.625	Erin	1.619	0.797	0.037	1.29	0.01947
6814-4B6c	14-4B6c	9-16-2019	68	photo	14-4B6c-photo	#F8766D	14-4B	1.805	Erin	1.765	Bailey	1.801	Erin	1.785	0.797	0.037	1.423	0.01947
8214-4B6c	14-4B6c	9-30-2019	82	photo	14-4B6c-photo	#F8766D	14-4B	2.071	Erin	2.073	Sarah	NA	NA	2.072	0.797	0.037	1.651	0.01947
9614-4B6c	14-4B6c	10-14-2019	96	photo	14-4B6c-photo	#F8766D	14-4B	2.505	Sarah	2.642	Sam	2.514	Bailey	2.51	0.797	0.037	2	0.01947
11114-4B6c	14-4B6c	10-29-2019	111	photo	14-4B6c-photo	#F8766D	14-4B	2.946	Rob	3.052	Sam	2.013	Erin	2.999	0.797	0.037	2.39	0.01947
12314-4B6c	14-4B6c	11-11-2019	123	photo	14-4B6c-photo	#F8766D	14-4B	3.421	Bailey	3.479	Sarah	NA	NA	3.45	0.797	0.037	2.749	0.01947
13714-4B6c	14-4B6c	11-25-2019	137	photo	14-4B6c-photo	#F8766D	14-4B	3.972	Rob	3.986	Sarah	NA	NA	3.979	0.797	0.037	3.171	0.01947
15114-4B6c	14-4B6c	12-9-2019	151	photo	14-4B6c-photo	#F8766D	14-4B	4.602	Erin	4.615	Sarah	NA	NA	4.609	0.797	0.037	3.673	0.01947
19314-4B6c	14-4B6c	1-21-2020	193	photo	14-4B6c-photo	#F8766D	14-4B	4.663	Bailey	4.7	Erin	NA	NA	4.682	0.797	0.037	3.731	0.01947
1514-4B6c	14-4B6c	7-23-2019	15	scan	14-4B6c-scan	#00BFC4	14-4B	NA	NA	NA	NA	NA	NA	1.34	NA	NA	1.34	0.01963
3514-4B6c	14-4B6c	8-13-2019	35	scan	14-4B6c-scan	#00BFC4	14-4B	NA	NA	NA	NA	NA	NA	1.55	NA	NA	1.55	0.01963
6814-4B6c	14-4B6c	9-16-2019	68	scan	14-4B6c-scan	#00BFC4	14-4B	NA	NA	NA	NA	NA	NA	2.2	NA	NA	2.2	0.01963
9914-4B6c	14-4B6c	10-17-2019	99	scan	14-4B6c-scan	#00BFC4	14-4B	NA	NA	NA	NA	NA	NA	2.68	NA	NA	2.68	0.01963
12414-4B6c	14-4B6c	11-12-2019	124	scan	14-4B6c-scan	#00BFC4	14-4B	NA	NA	NA	NA	NA	NA	3.39	NA	NA	3.39	0.01963
15214-4B6c	14-4B6c	12-10-2019	152	scan	14-4B6c-scan	#00BFC4	14-4B	NA	NA	NA	NA	NA	NA	4.04	NA	NA	4.04	0.01963
18614-4B6c	14-4B6c	1-14-2020	186	scan	14-4B6c-scan	#00BFC4	14-4B	NA	NA	NA	NA	NA	NA	4.44	NA	NA	4.44	0.01963
21314-4B6c	14-4B6c	2-11-2020	213	scan	14-4B6c-scan	#00BFC4	14-4B	NA	NA	NA	NA	NA	NA	5.17	NA	NA	5.17	0.01963
014-5A3c	14-5A3c	7-8-19	0	photo	14-5A3c-photo	#F8766D	14-5A	0.496	Erin	0.491	Sarah	0.497	Erin	0.494	0.845	0.029	0.418	0.0104
1414-5A3c	14-5A3c	7-22-19	14	photo	14-5A3c-photo	#F8766D	14-5A	0.778	Erin	0.795	Bailey	0.768	Erin	0.787	0.845	0.029	0.665	0.0104
2714-5A3c	14-5A3c	8-5-2019	27	photo	14-5A3c-photo	#F8766D	14-5A	0.785	Erin	0.793	Bailey	0.786	Erin	0.789	0.845	0.029	0.667	0.0104
4114-5A3c	14-5A3c	8-19-2019	41	photo	14-5A3c-photo	#F8766D	14-5A	0.88	Erin	0.885	Bailey	0.878	Erin	0.883	0.845	0.029	0.746	0.0104
5614-5A3c	14-5A3c	9-4-2019	56	photo	14-5A3c-photo	#F8766D	14-5A	1.155	Erin	1.17	Bailey	1.159	Erin	1.163	0.845	0.029	0.983	0.0104
6814-5A3c	14-5A3c	9-16-2019	68	photo	14-5A3c-photo	#F8766D	14-5A	1.282	Erin	1.286	Bailey	1.279	Erin	1.284	0.845	0.029	1.085	0.0104
8214-5A3c	14-5A3c	9-30-2019	82	photo	14-5A3c-photo	#F8766D	14-5A	1.506	Erin	1.542	Sarah	NA	NA	1.524	0.845	0.029	1.288	0.0104
9614-5A3c	14-5A3c	10-14-2019	96	photo	14-5A3c-photo	#F8766D	14-5A	1.673	Sarah	1.651	Sam	NA	NA	1.662	0.845	0.029	1.405	0.0104
11114-5A3c	14-5A3c	10-29-2019	111	photo	14-5A3c-photo	#F8766D	14-5A	1.646	Erin	1.631	Rob	NA	NA	1.639	0.845	0.029	1.385	0.0104
12314-5A3c	14-5A3c	11-11-2019	123	photo	14-5A3c-photo	#F8766D	14-5A	1.801	Bailey	1.853	Sarah	NA	NA	1.827	0.845	0.029	1.544	0.0104
13714-5A3c	14-5A3c	11-25-2019	137	photo	14-5A3c-photo	#F8766D	14-5A	2.153	Bailey	2.215	Sarah	NA	NA	2.184	0.845	0.029	1.846	0.0104
15114-5A3c	14-5A3c	12-9-2019	151	photo	14-5A3c-photo	#F8766D	14-5A	2.578	Erin	2.643	Sarah	NA	NA	2.611	0.845	0.029	2.207	0.0104
19314-5A3c	14-5A3c	1-21-2020	193	photo	14-5A3c-photo	#F8766D	14-5A	2.815	Bailey	2.84	Erin	NA	NA	2.828	0.845	0.029	2.391	0.0104
1514-5A3c	14-5A3c	7-23-2019	15	scan	14-5A3c-scan	#00BFC4	14-5A	NA	NA	NA	NA	NA	NA	1.07	NA	NA	1.07	0.01016
3514-5A3c	14-5A3c	8-13-2019	35	scan	14-5A3c-scan	#00BFC4	14-5A	NA	NA	NA	NA	NA	NA	1.22	NA	NA	1.22	0.01016
6814-5A3c	14-5A3c	9-16-2019	68	scan	14-5A3c-scan	#00BFC4	14-5A	NA	NA	NA	NA	NA	NA	1.65	NA	NA	1.65	0.01016
9914-5A3c	14-5A3c	10-17-2019	99	scan	14-5A3c-scan	#00BFC4	14-5A	NA	NA	NA	NA	NA	NA	1.83	NA	NA	1.83	0.01016
12414-5A3c	14-5A3c	11-12-2019	124	scan	14-5A3c-scan	#00BFC4	14-5A	NA	NA	NA	NA	NA	NA	2.05	NA	NA	2.05	0.01016
15214-5A3c	14-5A3c	12-10-2019	152	scan	14-5A3c-scan	#00BFC4	14-5A	NA	NA	NA	NA	NA	NA	2.41	NA	NA	2.41	0.01016
18614-5A3c	14-5A3c	1-14-2020	186	scan	14-5A3c-scan	#00BFC4	14-5A	NA	NA	NA	NA	NA	NA	2.77	NA	NA	2.77	0.01016
21314-5A3c	14-5A3c	2-11-2020	213	scan	14-5A3c-scan	#00BFC4	14-5A	NA	NA	NA	NA	NA	NA	3.11	NA	NA	3.11	0.01016
014-5A4r	14-5A4r	7-8-19	0	photo	14-5A4r-photo	#F8766D	14-5A	0.511	Erin	0.498	Bailey	0.508	Erin	0.505	0.925	0.014	0.467	0.00717
1414-5A4r	14-5A4r	7-22-19	14	photo	14-5A4r-photo	#F8766D	14-5A	0.625	Erin	0.602	Bailey	0.627	Erin	0.614	0.925	0.014	0.568	0.00717
2714-5A4r	14-5A4r	8-5-2019	27	photo	14-5A4r-photo	#F8766D	14-5A	0.75	Erin	0.755	Bailey	0.741	Erin	0.753	0.925	0.014	0.696	0.00717
4114-5A4r	14-5A4r	8-19-2019	41	photo	14-5A4r-photo	#F8766D	14-5A	0.791	Erin	0.791	Bailey	0.789	Erin	0.791	0.925	0.014	0.732	0.00717
5614-5A4r	14-5A4r	9-4-2019	56	photo	14-5A4r-photo	#F8766D	14-5A	0.972	Erin	0.966	Bailey	0.974	Erin	0.969	0.925	0.014	0.896	0.00717
6814-5A4r	14-5A4r	9-16-2019	68	photo	14-5A4r-photo	#F8766D	14-5A	1.135	Erin	1.126	Bailey	1.136	Erin	1.131	0.925	0.014	1.046	0.00717
8214-5A4r	14-5A4r	9-30-2019	82	photo	14-5A4r-photo	#F8766D	14-5A	1.26	Erin	1.254	Sarah	NA	NA	1.257	0.925	0.014	1.163	0.00717
9614-5A4r	14-5A4r	10-14-2019	96	photo	14-5A4r-photo	#F8766D	14-5A	1.349	Sarah	1.305	Sam	NA	NA	1.327	0.925	0.014	1.227	0.00717
11114-5A4r	14-5A4r	10-29-2019	111	photo	14-5A4r-photo	#F8766D	14-5A	1.379	Erin	1.362	Rob	NA	NA	1.371	0.925	0.014	1.268	0.00717
12314-5A4r	14-5A4r	11-11-2019	123	photo	14-5A4r-photo	#F8766D	14-5A	1.451	Bailey	1.439	Sarah	NA	NA	1.445	0.925	0.014	1.337	0.00717
13714-5A4r	14-5A4r	11-25-2019	137	photo	14-5A4r-photo	#F8766D	14-5A	1.594	Bailey	1.65	Sarah	NA	NA	1.622	0.925	0.014	1.5	0.00717
15114-5A4r	14-5A4r	12-9-2019	151	photo	14-5A4r-photo	#F8766D	14-5A	1.754	Erin	1.753	Sarah	NA	NA	1.754	0.925	0.014	1.622	0.00717
19314-5A4r	14-5A4r	1-21-2020	193	photo	14-5A4r-photo	#F8766D	14-5A	1.925	Bailey	1.988	Erin	NA	NA	1.957	0.925	0.014	1.81	0.00717
1514-5A4r	14-5A4r	7-23-2019	15	scan	14-5A4r-scan	#00BFC4	14-5A	NA	NA	NA	NA	NA	NA	1.23	NA	NA	1.23	0.00782
3514-5A4r	14-5A4r	8-13-2019	35	scan	14-5A4r-scan	#00BFC4	14-5A	NA	NA	NA	NA	NA	NA	1.37	NA	NA	1.37	0.00782
6814-5A4r	14-5A4r	9-16-2019	68	scan	14-5A4r-scan	#00BFC4	14-5A	NA	NA	NA	NA	NA	NA	1.75	NA	NA	1.75	0.00782
9914-5A4r	14-5A4r	10-17-2019	99	scan	14-5A4r-scan	#00BFC4	14-5A	NA	NA	NA	NA	NA	NA	1.98	NA	NA	1.98	0.00782
12414-5A4r	14-5A4r	11-12-2019	124	scan	14-5A4r-scan	#00BFC4	14-5A	NA	NA	NA	NA	NA	NA	2.15	NA	NA	2.15	0.00782
15214-5A4r	14-5A4r	12-10-2019	152	scan	14-5A4r-scan	#00BFC4	14-5A	NA	NA	NA	NA	NA	NA	2.3	NA	NA	2.3	0.00782
18614-5A4r	14-5A4r	1-14-2020	186	scan	14-5A4r-scan	#00BFC4	14-5A	NA	NA	NA	NA	NA	NA	2.56	NA	NA	2.56	0.00782
21314-5A4r	14-5A4r	2-11-2020	213	scan	14-5A4r-scan	#00BFC4	14-5A	NA	NA	NA	NA	NA	NA	2.82	NA	NA	2.82	0.00782
014-5B1c	14-5B1c	7-8-19	0	photo	14-5B1c-photo	#F8766D	14-5B	0.534	Erin	0.537	Sarah	0.534	Erin	0.536	0.793	0.032	0.425	0.01028
1414-5B1c	14-5B1c	7-22-19	14	photo	14-5B1c-photo	#F8766D	14-5B	0.778	Erin	0.709	Bailey	0.742	Sarah	0.76	0.793	0.032	0.603	0.01028
2714-5B1c	14-5B1c	8-5-2019	27	photo	14-5B1c-photo	#F8766D	14-5B	0.768	Erin	0.751	Bailey	0.772	Erin	0.76	0.793	0.032	0.603	0.01028
4114-5B1c	14-5B1c	8-19-2019	41	photo	14-5B1c-photo	#F8766D	14-5B	0.93	Erin	0.948	Bailey	0.935	Erin	0.939	0.793	0.032	0.745	0.01028
5614-5B1c	14-5B1c	9-4-2019	56	photo	14-5B1c-photo	#F8766D	14-5B	1.181	Bailey	1.198	Sarah	NA	NA	1.19	0.793	0.032	0.944	0.01028
6814-5B1c	14-5B1c	9-16-2019	68	photo	14-5B1c-photo	#F8766D	14-5B	1.323	Erin	1.313	Bailey	1.322	Erin	1.318	0.793	0.032	1.045	0.01028
8214-5B1c	14-5B1c	9-30-2019	82	photo	14-5B1c-photo	#F8766D	14-5B	1.537	Erin	1.545	Sarah	NA	NA	1.541	0.793	0.032	1.222	0.01028
9614-5B1c	14-5B1c	10-14-2019	96	photo	14-5B1c-photo	#F8766D	14-5B	1.61	Sarah	1.582	Sam	NA	NA	1.596	0.793	0.032	1.265	0.01028
11114-5B1c	14-5B1c	10-29-2019	111	photo	14-5B1c-photo	#F8766D	14-5B	1.824	Erin	1.786	Rob	NA	NA	1.805	0.793	0.032	1.431	0.01028
12314-5B1c	14-5B1c	11-11-2019	123	photo	14-5B1c-photo	#F8766D	14-5B	2.016	Bailey	2.084	Sarah	NA	NA	2.05	0.793	0.032	1.625	0.01028
13714-5B1c	14-5B1c	11-25-2019	137	photo	14-5B1c-photo	#F8766D	14-5B	2.325	Bailey	2.386	Sarah	NA	NA	2.356	0.793	0.032	1.868	0.01028
15114-5B1c	14-5B1c	12-9-2019	151	photo	14-5B1c-photo	#F8766D	14-5B	2.635	Erin	2.636	Sarah	NA	NA	2.636	0.793	0.032	2.09	0.01028
19314-5B1c	14-5B1c	1-21-2020	193	photo	14-5B1c-photo	#F8766D	14-5B	2.849	Bailey	2.939	Erin	NA	NA	2.894	0.793	0.032	2.295	0.01028
1514-5B1c	14-5B1c	7-23-2019	15	scan	14-5B1c-scan	#00BFC4	14-5B	NA	NA	NA	NA	NA	NA	1.28	NA	NA	1.28	0.01052
3514-5B1c	14-5B1c	8-13-2019	35	scan	14-5B1c-scan	#00BFC4	14-5B	NA	NA	NA	NA	NA	NA	1.4	NA	NA	1.4	0.01052
6814-5B1c	14-5B1c	9-16-2019	68	scan	14-5B1c-scan	#00BFC4	14-5B	NA	NA	NA	NA	NA	NA	1.98	NA	NA	1.98	0.01052
9914-5B1c	14-5B1c	10-17-2019	99	scan	14-5B1c-scan	#00BFC4	14-5B	NA	NA	NA	NA	NA	NA	NA	NA	NA	NA	0.01052
12414-5B1c	14-5B1c	11-12-2019	124	scan	14-5B1c-scan	#00BFC4	14-5B	NA	NA	NA	NA	NA	NA	2.48	NA	NA	2.48	0.01052
15214-5B1c	14-5B1c	12-10-2019	152	scan	14-5B1c-scan	#00BFC4	14-5B	NA	NA	NA	NA	NA	NA	2.69	NA	NA	2.69	0.01052
18614-5B1c	14-5B1c	1-14-2020	186	scan	14-5B1c-scan	#00BFC4	14-5B	NA	NA	NA	NA	NA	NA	3.03	NA	NA	3.03	0.01052
21314-5B1c	14-5B1c	2-11-2020	213	scan	14-5B1c-scan	#00BFC4	14-5B	NA	NA	NA	NA	NA	NA	3.4	NA	NA	3.4	0.01052
014-5B1r	14-5B1r	7-8-19	0	photo	14-5B1r-photo	#F8766D	14-5B	0.409	Erin	0.413	Sarah	0.407	Erin	0.411	0.918	0.021	0.377	0.0061
1414-5B1r	14-5B1r	7-22-19	14	photo	14-5B1r-photo	#F8766D	14-5B	0.516	Erin	0.504	Bailey	0.509	Erin	0.51	0.918	0.021	0.468	0.0061
2714-5B1r	14-5B1r	8-5-2019	27	photo	14-5B1r-photo	#F8766D	14-5B	0.605	Erin	0.619	Bailey	0.611	Erin	0.612	0.918	0.021	0.562	0.0061
4114-5B1r	14-5B1r	8-19-2019	41	photo	14-5B1r-photo	#F8766D	14-5B	0.735	Erin	0.734	Bailey	0.747	Erin	0.735	0.918	0.021	0.675	0.0061
5614-5B1r	14-5B1r	9-4-2019	56	photo	14-5B1r-photo	#F8766D	14-5B	0.791	Erin	0.784	Bailey	0.79	Erin	0.788	0.918	0.021	0.723	0.0061
6814-5B1r	14-5B1r	9-16-2019	68	photo	14-5B1r-photo	#F8766D	14-5B	0.958	Erin	0.933	Bailey	0.951	Erin	0.946	0.918	0.021	0.868	0.0061
8214-5B1r	14-5B1r	9-30-2019	82	photo	14-5B1r-photo	#F8766D	14-5B	1.045	Erin	1.055	Sarah	NA	NA	1.05	0.918	0.021	0.964	0.0061
9614-5B1r	14-5B1r	10-14-2019	96	photo	14-5B1r-photo	#F8766D	14-5B	1.112	Sarah	1.099	Sam	NA	NA	1.106	0.918	0.021	1.015	0.0061
11114-5B1r	14-5B1r	10-29-2019	111	photo	14-5B1r-photo	#F8766D	14-5B	1.13	Erin	1.089	Rob	NA	NA	1.11	0.918	0.021	1.019	0.0061
12314-5B1r	14-5B1r	11-11-2019	123	photo	14-5B1r-photo	#F8766D	14-5B	1.257	Bailey	1.281	Sarah	NA	NA	1.269	0.918	0.021	1.165	0.0061
13714-5B1r	14-5B1r	11-25-2019	137	photo	14-5B1r-photo	#F8766D	14-5B	1.327	Bailey	1.362	Sarah	NA	NA	1.345	0.918	0.021	1.234	0.0061
15114-5B1r	14-5B1r	12-9-2019	151	photo	14-5B1r-photo	#F8766D	14-5B	1.545	Erin	1.538	Sarah	NA	NA	1.542	0.918	0.021	1.415	0.0061
19314-5B1r	14-5B1r	1-21-2020	193	photo	14-5B1r-photo	#F8766D	14-5B	1.627	Bailey	1.664	Erin	NA	NA	1.646	0.918	0.021	1.511	0.0061
1514-5B1r	14-5B1r	7-23-2019	15	scan	14-5B1r-scan	#00BFC4	14-5B	NA	NA	NA	NA	NA	NA	1.11	NA	NA	1.11	0.00649
3514-5B1r	14-5B1r	8-13-2019	35	scan	14-5B1r-scan	#00BFC4	14-5B	NA	NA	NA	NA	NA	NA	1.28	NA	NA	1.28	0.00649
6814-5B1r	14-5B1r	9-16-2019	68	scan	14-5B1r-scan	#00BFC4	14-5B	NA	NA	NA	NA	NA	NA	1.51	NA	NA	1.51	0.00649
9914-5B1r	14-5B1r	10-17-2019	99	scan	14-5B1r-scan	#00BFC4	14-5B	NA	NA	NA	NA	NA	NA	1.66	NA	NA	1.66	0.00649
12414-5B1r	14-5B1r	11-12-2019	124	scan	14-5B1r-scan	#00BFC4	14-5B	NA	NA	NA	NA	NA	NA	1.85	NA	NA	1.85	0.00649
15214-5B1r	14-5B1r	12-10-2019	152	scan	14-5B1r-scan	#00BFC4	14-5B	NA	NA	NA	NA	NA	NA	2	NA	NA	2	0.00649
18614-5B1r	14-5B1r	1-14-2020	186	scan	14-5B1r-scan	#00BFC4	14-5B	NA	NA	NA	NA	NA	NA	2.27	NA	NA	2.27	0.00649
21314-5B1r	14-5B1r	2-11-2020	213	scan	14-5B1r-scan	#00BFC4	14-5B	NA	NA	NA	NA	NA	NA	2.41	NA	NA	2.41	0.00649
0XAC4c	XAC4c	7-8-19	0	photo	XAC4c-photo	#F8766D	XAC	0.384	Erin	0.387	Sarah	0.386	Erin	0.386	0.939	0.018	0.363	0.00558
14XAC4c	XAC4c	7-22-19	14	photo	XAC4c-photo	#F8766D	XAC	0.596	Erin	0.594	Bailey	0.605	Erin	0.595	0.939	0.018	0.559	0.00558
27XAC4c	XAC4c	8-5-2019	27	photo	XAC4c-photo	#F8766D	XAC	0.653	Erin	0.626	Bailey	0.653	Erin	0.64	0.939	0.018	0.601	0.00558
41XAC4c	XAC4c	8-19-2019	41	photo	XAC4c-photo	#F8766D	XAC	0.668	Erin	0.635	Bailey	0.67	Erin	0.669	0.939	0.018	0.628	0.00558
56XAC4c	XAC4c	9-4-2019	56	photo	XAC4c-photo	#F8766D	XAC	0.784	Erin	0.777	Bailey	0.784	Erin	0.781	0.939	0.018	0.734	0.00558
68XAC4c	XAC4c	9-16-2019	68	photo	XAC4c-photo	#F8766D	XAC	0.895	Erin	0.887	Bailey	0.89	Erin	0.891	0.939	0.018	0.837	0.00558
82XAC4c	XAC4c	9-30-2019	82	photo	XAC4c-photo	#F8766D	XAC	0.97	Erin	0.971	Sarah	NA	NA	0.971	0.939	0.018	0.912	0.00558
96XAC4c	XAC4c	10-14-2019	96	photo	XAC4c-photo	#F8766D	XAC	1.043	Sarah	1.082	Sam	NA	NA	1.063	0.939	0.018	0.999	0.00558
111XAC4c	XAC4c	10-29-2019	111	photo	XAC4c-photo	#F8766D	XAC	1.126	Erin	1.113	Rob	NA	NA	1.12	0.939	0.018	1.052	0.00558
123XAC4c	XAC4c	11-11-2019	123	photo	XAC4c-photo	#F8766D	XAC	1.197	Bailey	1.198	Sarah	NA	NA	1.198	0.939	0.018	1.125	0.00558
137XAC4c	XAC4c	11-25-2019	137	photo	XAC4c-photo	#F8766D	XAC	1.338	Bailey	1.368	Erin	NA	NA	1.353	0.939	0.018	1.271	0.00558
151XAC4c	XAC4c	12-9-2019	151	photo	XAC4c-photo	#F8766D	XAC	1.444	Erin	1.422	Bailey	NA	NA	1.433	0.939	0.018	1.346	0.00558
193XAC4c	XAC4c	1-21-2020	193	photo	XAC4c-photo	#F8766D	XAC	1.484	Bailey	1.497	Erin	NA	NA	1.491	0.939	0.018	1.401	0.00558
15XAC4c	XAC4c	7-23-2019	15	scan	XAC4c-scan	#00BFC4	XAC	NA	NA	NA	NA	NA	NA	1.12	NA	NA	1.12	0.00601
35XAC4c	XAC4c	8-13-2019	35	scan	XAC4c-scan	#00BFC4	XAC	NA	NA	NA	NA	NA	NA	1.22	NA	NA	1.22	0.00601
68XAC4c	XAC4c	9-16-2019	68	scan	XAC4c-scan	#00BFC4	XAC	NA	NA	NA	NA	NA	NA	1.39	NA	NA	1.39	0.00601
99XAC4c	XAC4c	10-17-2019	99	scan	XAC4c-scan	#00BFC4	XAC	NA	NA	NA	NA	NA	NA	1.66	NA	NA	1.66	0.00601
124XAC4c	XAC4c	11-12-2019	124	scan	XAC4c-scan	#00BFC4	XAC	NA	NA	NA	NA	NA	NA	1.91	NA	NA	1.91	0.00601
152XAC4c	XAC4c	12-10-2019	152	scan	XAC4c-scan	#00BFC4	XAC	NA	NA	NA	NA	NA	NA	1.94	NA	NA	1.94	0.00601
186XAC4c	XAC4c	1-14-2020	186	scan	XAC4c-scan	#00BFC4	XAC	NA	NA	NA	NA	NA	NA	2.11	NA	NA	2.11	0.00601
213XAC4c	XAC4c	2-11-2020	213	scan	XAC4c-scan	#00BFC4	XAC	NA	NA	NA	NA	NA	NA	2.29	NA	NA	2.29	0.00601
0XAC7r	XAC7r	7-8-19	0	photo	XAC7r-photo	#F8766D	XAC	0.456	Erin	0.46	Sarah	0.456	Erin	0.458	0.928	0.032	0.425	0.00711
14XAC7r	XAC7r	7-22-19	14	photo	XAC7r-photo	#F8766D	XAC	0.661	Erin	0.652	Bailey	0.653	Erin	0.657	0.928	0.032	0.61	0.00711
27XAC7r	XAC7r	8-5-2019	27	photo	XAC7r-photo	#F8766D	XAC	0.687	Erin	0.697	Bailey	0.69	Erin	0.692	0.928	0.032	0.642	0.00711
41XAC7r	XAC7r	8-19-2019	41	photo	XAC7r-photo	#F8766D	XAC	0.716	Erin	0.721	Bailey	0.709	Erin	0.719	0.928	0.032	0.667	0.00711
56XAC7r	XAC7r	9-4-2019	56	photo	XAC7r-photo	#F8766D	XAC	0.791	Erin	0.789	Bailey	0.796	Erin	0.79	0.928	0.032	0.733	0.00711
68XAC7r	XAC7r	9-16-2019	68	photo	XAC7r-photo	#F8766D	XAC	0.993	Erin	1.001	Bailey	0.995	Erin	0.997	0.928	0.032	0.926	0.00711
82XAC7r	XAC7r	9-30-2019	82	photo	XAC7r-photo	#F8766D	XAC	1.037	Erin	1.041	Sarah	NA	NA	1.039	0.928	0.032	0.965	0.00711
96XAC7r	XAC7r	10-14-2019	96	photo	XAC7r-photo	#F8766D	XAC	1.118	Sarah	1.08	Sam	NA	NA	1.099	0.928	0.032	1.02	0.00711
111XAC7r	XAC7r	10-29-2019	111	photo	XAC7r-photo	#F8766D	XAC	1.301	Erin	1.312	Rob	NA	NA	1.307	0.928	0.032	1.213	0.00711
123XAC7r	XAC7r	11-11-2019	123	photo	XAC7r-photo	#F8766D	XAC	1.4	Bailey	1.4	Sarah	NA	NA	1.4	0.928	0.032	1.3	0.00711
137XAC7r	XAC7r	11-25-2019	137	photo	XAC7r-photo	#F8766D	XAC	1.46	Bailey	1.48	Erin	NA	NA	1.47	0.928	0.032	1.365	0.00711
151XAC7r	XAC7r	12-9-2019	151	photo	XAC7r-photo	#F8766D	XAC	1.769	Erin	1.763	Bailey	NA	NA	1.766	0.928	0.032	1.639	0.00711
193XAC7r	XAC7r	1-21-2020	193	photo	XAC7r-photo	#F8766D	XAC	1.901	Bailey	1.901	Erin	NA	NA	1.901	0.928	0.032	1.765	0.00711
15XAC7r	XAC7r	7-23-2019	15	scan	XAC7r-scan	#00BFC4	XAC	NA	NA	NA	NA	NA	NA	1.3	NA	NA	1.3	0.00739
35XAC7r	XAC7r	8-13-2019	35	scan	XAC7r-scan	#00BFC4	XAC	NA	NA	NA	NA	NA	NA	1.48	NA	NA	1.48	0.00739
68XAC7r	XAC7r	9-16-2019	68	scan	XAC7r-scan	#00BFC4	XAC	NA	NA	NA	NA	NA	NA	1.72	NA	NA	1.72	0.00739
99XAC7r	XAC7r	10-17-2019	99	scan	XAC7r-scan	#00BFC4	XAC	NA	NA	NA	NA	NA	NA	1.8	NA	NA	1.8	0.00739
124XAC7r	XAC7r	11-12-2019	124	scan	XAC7r-scan	#00BFC4	XAC	NA	NA	NA	NA	NA	NA	2.19	NA	NA	2.19	0.00739
152XAC7r	XAC7r	12-10-2019	152	scan	XAC7r-scan	#00BFC4	XAC	NA	NA	NA	NA	NA	NA	2.28	NA	NA	2.28	0.00739
186XAC7r	XAC7r	1-14-2020	186	scan	XAC7r-scan	#00BFC4	XAC	NA	NA	NA	NA	NA	NA	2.6	NA	NA	2.6	0.00739
213XAC7r	XAC7r	2-11-2020	213	scan	XAC7r-scan	#00BFC4	XAC	NA	NA	NA	NA	NA	NA	2.76	NA	NA	2.76	0.00739
0XAD2c	XAD2c	7-8-19	0	photo	XAD2c-photo	#F8766D	XAD	0.577	Erin	0.576	Sarah	0.573	Erin	0.577	0.825	0.03	0.476	0.00953
14XAD2c	XAD2c	7-22-19	14	photo	XAD2c-photo	#F8766D	XAD	0.801	Erin	0.769	Bailey	0.8	Erin	0.785	0.825	0.03	0.648	0.00953
27XAD2c	XAD2c	8-5-2019	27	photo	XAD2c-photo	#F8766D	XAD	0.852	Erin	0.847	Bailey	0.853	Erin	0.85	0.825	0.03	0.702	0.00953
41XAD2c	XAD2c	8-19-2019	41	photo	XAD2c-photo	#F8766D	XAD	1.108	Erin	1.12	Bailey	1.102	Erin	1.114	0.825	0.03	0.919	0.00953
68XAD2c	XAD2c	9-16-2019	68	photo	XAD2c-photo	#F8766D	XAD	1.354	Erin	1.336	Bailey	1.354	Erin	1.345	0.825	0.03	1.11	0.00953
82XAD2c	XAD2c	9-30-2019	82	photo	XAD2c-photo	#F8766D	XAD	1.383	Erin	1.376	Sarah	NA	NA	1.38	0.825	0.03	1.139	0.00953
96XAD2c	XAD2c	10-14-2019	96	photo	XAD2c-photo	#F8766D	XAD	1.544	Sarah	1.593	Sam	NA	NA	1.569	0.825	0.03	1.295	0.00953
111XAD2c	XAD2c	10-29-2019	111	photo	XAD2c-photo	#F8766D	XAD	1.736	Erin	1.734	Rob	NA	NA	1.735	0.825	0.03	1.432	0.00953
123XAD2c	XAD2c	11-11-2019	123	photo	XAD2c-photo	#F8766D	XAD	2.039	Bailey	2.079	Sarah	NA	NA	2.059	0.825	0.03	1.699	0.00953
137XAD2c	XAD2c	11-25-2019	137	photo	XAD2c-photo	#F8766D	XAD	2.334	Bailey	2.34	Erin	NA	NA	2.337	0.825	0.03	1.929	0.00953
151XAD2c	XAD2c	12-9-2019	151	photo	XAD2c-photo	#F8766D	XAD	2.445	Erin	2.478	Bailey	NA	NA	2.462	0.825	0.03	2.032	0.00953
193XAD2c	XAD2c	1-21-2020	193	photo	XAD2c-photo	#F8766D	XAD	2.67	Bailey	2.693	Erin	NA	NA	2.682	0.825	0.03	2.213	0.00953
15XAD2c	XAD2c	7-23-2019	15	scan	XAD2c-scan	#00BFC4	XAD	NA	NA	NA	NA	NA	NA	1.32	NA	NA	1.32	0.01016
35XAD2c	XAD2c	8-13-2019	35	scan	XAD2c-scan	#00BFC4	XAD	NA	NA	NA	NA	NA	NA	1.49	NA	NA	1.49	0.01016
68XAD2c	XAD2c	9-16-2019	68	scan	XAD2c-scan	#00BFC4	XAD	NA	NA	NA	NA	NA	NA	1.85	NA	NA	1.85	0.01016
99XAD2c	XAD2c	10-17-2019	99	scan	XAD2c-scan	#00BFC4	XAD	NA	NA	NA	NA	NA	NA	2.11	NA	NA	2.11	0.01016
124XAD2c	XAD2c	11-12-2019	124	scan	XAD2c-scan	#00BFC4	XAD	NA	NA	NA	NA	NA	NA	2.55	NA	NA	2.55	0.01016
152XAD2c	XAD2c	12-10-2019	152	scan	XAD2c-scan	#00BFC4	XAD	NA	NA	NA	NA	NA	NA	2.76	NA	NA	2.76	0.01016
186XAD2c	XAD2c	1-14-2020	186	scan	XAD2c-scan	#00BFC4	XAD	NA	NA	NA	NA	NA	NA	2.95	NA	NA	2.95	0.01016
213XAD2c	XAD2c	2-11-2020	213	scan	XAD2c-scan	#00BFC4	XAD	NA	NA	NA	NA	NA	NA	3.34	NA	NA	3.34	0.01016
0XAD2r	XAD2r	7-8-19	0	photo	XAD2r-photo	#F8766D	XAD	0.505	Erin	0.494	Sarah	0.506	Erin	0.5	0.932	0.018	0.466	0.00993
14XAD2r	XAD2r	7-22-19	14	photo	XAD2r-photo	#F8766D	XAD	0.74	Erin	0.728	Bailey	0.735	Erin	0.734	0.932	0.018	0.684	0.00993
27XAD2r	XAD2r	8-5-2019	27	photo	XAD2r-photo	#F8766D	XAD	0.753	Erin	0.758	Bailey	0.755	Erin	0.756	0.932	0.018	0.704	0.00993
41XAD2r	XAD2r	8-19-2019	41	photo	XAD2r-photo	#F8766D	XAD	0.971	Erin	0.957	Bailey	0.968	Erin	0.964	0.932	0.018	0.898	0.00993
56XAD2r	XAD2r	9-4-2019	56	photo	XAD2r-photo	#F8766D	XAD	1.101	Erin	1.089	Bailey	1.096	Erin	1.095	0.932	0.018	1.02	0.00993
68XAD2r	XAD2r	9-16-2019	68	photo	XAD2r-photo	#F8766D	XAD	1.314	Erin	1.295	Bailey	1.313	Erin	1.305	0.932	0.018	1.216	0.00993
82XAD2r	XAD2r	9-30-2019	82	photo	XAD2r-photo	#F8766D	XAD	1.412	Erin	1.399	Sarah	NA	NA	1.406	0.932	0.018	1.31	0.00993
96XAD2r	XAD2r	10-14-2019	96	photo	XAD2r-photo	#F8766D	XAD	1.543	Sarah	1.426	Sam	1.488	Bailey	1.516	0.932	0.018	1.412	0.00993
111XAD2r	XAD2r	10-29-2019	111	photo	XAD2r-photo	#F8766D	XAD	1.774	Erin	1.764	Rob	NA	NA	1.769	0.932	0.018	1.648	0.00993
123XAD2r	XAD2r	11-11-2019	123	photo	XAD2r-photo	#F8766D	XAD	1.912	Bailey	1.971	Sarah	NA	NA	1.942	0.932	0.018	1.809	0.00993
137XAD2r	XAD2r	11-25-2019	137	photo	XAD2r-photo	#F8766D	XAD	2.033	Bailey	2.054	Erin	NA	NA	2.044	0.932	0.018	1.904	0.00993
151XAD2r	XAD2r	12-9-2019	151	photo	XAD2r-photo	#F8766D	XAD	2.26	Erin	2.216	Bailey	NA	NA	2.238	0.932	0.018	2.085	0.00993
193XAD2r	XAD2r	1-21-2020	193	photo	XAD2r-photo	#F8766D	XAD	2.438	Bailey	2.423	Erin	NA	NA	2.431	0.932	0.018	2.265	0.00993
15XAD2r	XAD2r	7-23-2019	15	scan	XAD2r-scan	#00BFC4	XAD	NA	NA	NA	NA	NA	NA	1.28	NA	NA	1.28	0.00999
35XAD2r	XAD2r	8-13-2019	35	scan	XAD2r-scan	#00BFC4	XAD	NA	NA	NA	NA	NA	NA	1.53	NA	NA	1.53	0.00999
68XAD2r	XAD2r	9-16-2019	68	scan	XAD2r-scan	#00BFC4	XAD	NA	NA	NA	NA	NA	NA	2.05	NA	NA	2.05	0.00999
99XAD2r	XAD2r	10-17-2019	99	scan	XAD2r-scan	#00BFC4	XAD	NA	NA	NA	NA	NA	NA	2.07	NA	NA	2.07	0.00999
124XAD2r	XAD2r	11-12-2019	124	scan	XAD2r-scan	#00BFC4	XAD	NA	NA	NA	NA	NA	NA	2.54	NA	NA	2.54	0.00999
152XAD2r	XAD2r	12-10-2019	152	scan	XAD2r-scan	#00BFC4	XAD	NA	NA	NA	NA	NA	NA	2.79	NA	NA	2.79	0.00999
186XAD2r	XAD2r	1-14-2020	186	scan	XAD2r-scan	#00BFC4	XAD	NA	NA	NA	NA	NA	NA	2.97	NA	NA	2.97	0.00999
213XAD2r	XAD2r	2-11-2020	213	scan	XAD2r-scan	#00BFC4	XAD	NA	NA	NA	NA	NA	NA	3.33	NA	NA	3.33	0.00999

## Sheet: CORAL AREA COLUMN KEY
Column name	Data type	Data structure	Description
masterID	Nominal	Factor	Compound Variable, combination of ID and d.since.start. Truly unique.
ID	Nominal	Factor	Compound Variable, combination of medallion ID and fragment ID. Unique per coral, same over time.
Date	Interval	Date	Date data were collected.
d.since.start	Ratio	Numeric	Number of days between when data collected and when data collection began.
data.type	Nominal	Factor	Measurement method: Photo or Scan.
ID_type	Nominal	Factor	Compound Variable, combining ID and data.type. Used in model construction.
color.type	Nominal	Factor	Color vector. Used to color graphs.
unique.med	Nominal	Factor	Medallion ID.
area.1	Ratio	Numeric	2D photo area estimate. Not used for scanning rows.
tech.1	Nominal	Character	Name of biologist who created 2D photo area estimate.
area.2	Ratio	Numeric	2D photo area estimate. Not used for scanning rows.
tech.2	Nominal	Character	Name of biologist who created 2D photo area estimate.
area.3	Ratio	Numeric	2D photo area estimate. Not used for scanning rows.
tech.3	Nominal	Character	Name of biologist who created 2D photo area estimate.
mean.area	Ratio	Numeric	for photos, mean of 2 closest 2D estimates. For scan, this is simply the calibrated scan area. These data are uncorrected for photos; use area.corr for all figures and analyses.
meancf	Ratio	Numeric	mean correction factor for each coral.
sdcf	Ratio	Numeric	standard deviation of the correction factor.
area.corr	Ratio	Numeric	corrected surface area estimates. Use this for all figure and model generation and analyses.
coral_growth	Ratio	Numeric	corrected estimate of coral growth over time by measurement type.

## Sheet: TIMING DATA
method	time
scan	18.62
scan	26.8
scan	21.2
scan	14.82
scan	16.63
scan	23.22
scan	15.75
scan	14.23
scan	15.63
scan	15.12
scan	16.47
scan	15.15
scan	11.03
scan	11.38
scan	11.15
scan	16.47
scan	13.6
scan	13.52
scan	17.73
scan	13.53
scan	13.1
scan	13.52
scan	13.77
scan	16.22
scan	15.78
scan	23.72
scan	20.35
scan	15.67
scan	15.37
scan	13.98
scan	15.05
scan	13.28
scan	16.88
scan	12.43
scan	11.5
scan	14.6
scan	13.87
scan	13.43
scan	16
scan	14.55
scan	13.73
scan	14.58
scan	9.87
scan	10.32
scan	10.42
scan	15.55
scan	14.65
scan	15.3
scan	11.47
scan	17.2
scan	13.77
scan	15.77
scan	11.27
scan	14.2
scan	18.43
scan	14.3
scan	14.42
scan	11.97
scan	13.42
scan	12.85
scan	13.25
scan	12.85
scan	13.93
scan	15.5
scan	14.38
scan	11.72
scan	15.18
scan	13.57
scan	14.82
scan	13.63
scan	14.08
scan	10.77
scan	12.65
scan	15.12
scan	16.52
photo	2.29
photo	2.27
photo	1.93
photo	1.72
photo	1.87
photo	2.2
photo	2.36
photo	1.66
photo	2.03
photo	1.82
photo	2.12
photo	1.96
photo	2.21
photo	1.84
photo	1.82
photo	1.89
photo	2.34
photo	2.74
photo	2.47
photo	2.12
photo	1.67
photo	1.92
photo	1.78
photo	1.95
photo	1.68
photo	2.02
photo	1.97
photo	2.12
photo	1.91
photo	1.68

## Sheet: TIMING DATA COLUMN KEY
Column name	Data type	Data structure	Description
method	nominal	factor	measurement method used.
time	ratio	numeric	time to go from removing coral to obtaining area estimate, in minutes.

## Sheet: KOCH_2021_FIMS_CORAL_AREA_DATA
Journal	Frontiers in Marine Science
Title	3D scanning as a tool to measure growth rates of live coral microfragments used for coral reef restoration
Authors	Hanna Koch1*, Bailey Wallace1 , Allyson DeMerlis2, 3, Abigail Clark1 , Robert J. Nowicki1
Abstract	Rapid and widespread declines in coral health and abundance have driven increased investments in coral reef restoration interventions to jumpstart population recovery. Microfragmentation, an asexual propagation technique, is used to produce large numbers of corals for research and restoration. As part of resilience-based restoration, coral microfragments of different genotypes and species are exp…
Usage Notes:	These data are presented as-is and, in conjunction with the code provided, will be able to reproduce the figures and analyses in this manuscript.
Contact:	For questions specifically about the analysis or data, please contact Robert Nowicki at rnowicki@mote.org
